# Supplementary figures and images for: Rapid, Selective, and Ultra-Sensitive Electronic Field Effect Detection of <em>Escherichia coli</em>
Source: Preprints.org preprint supplement (doi:10.20944/preprints202406.1630.v1), 2024-06-24

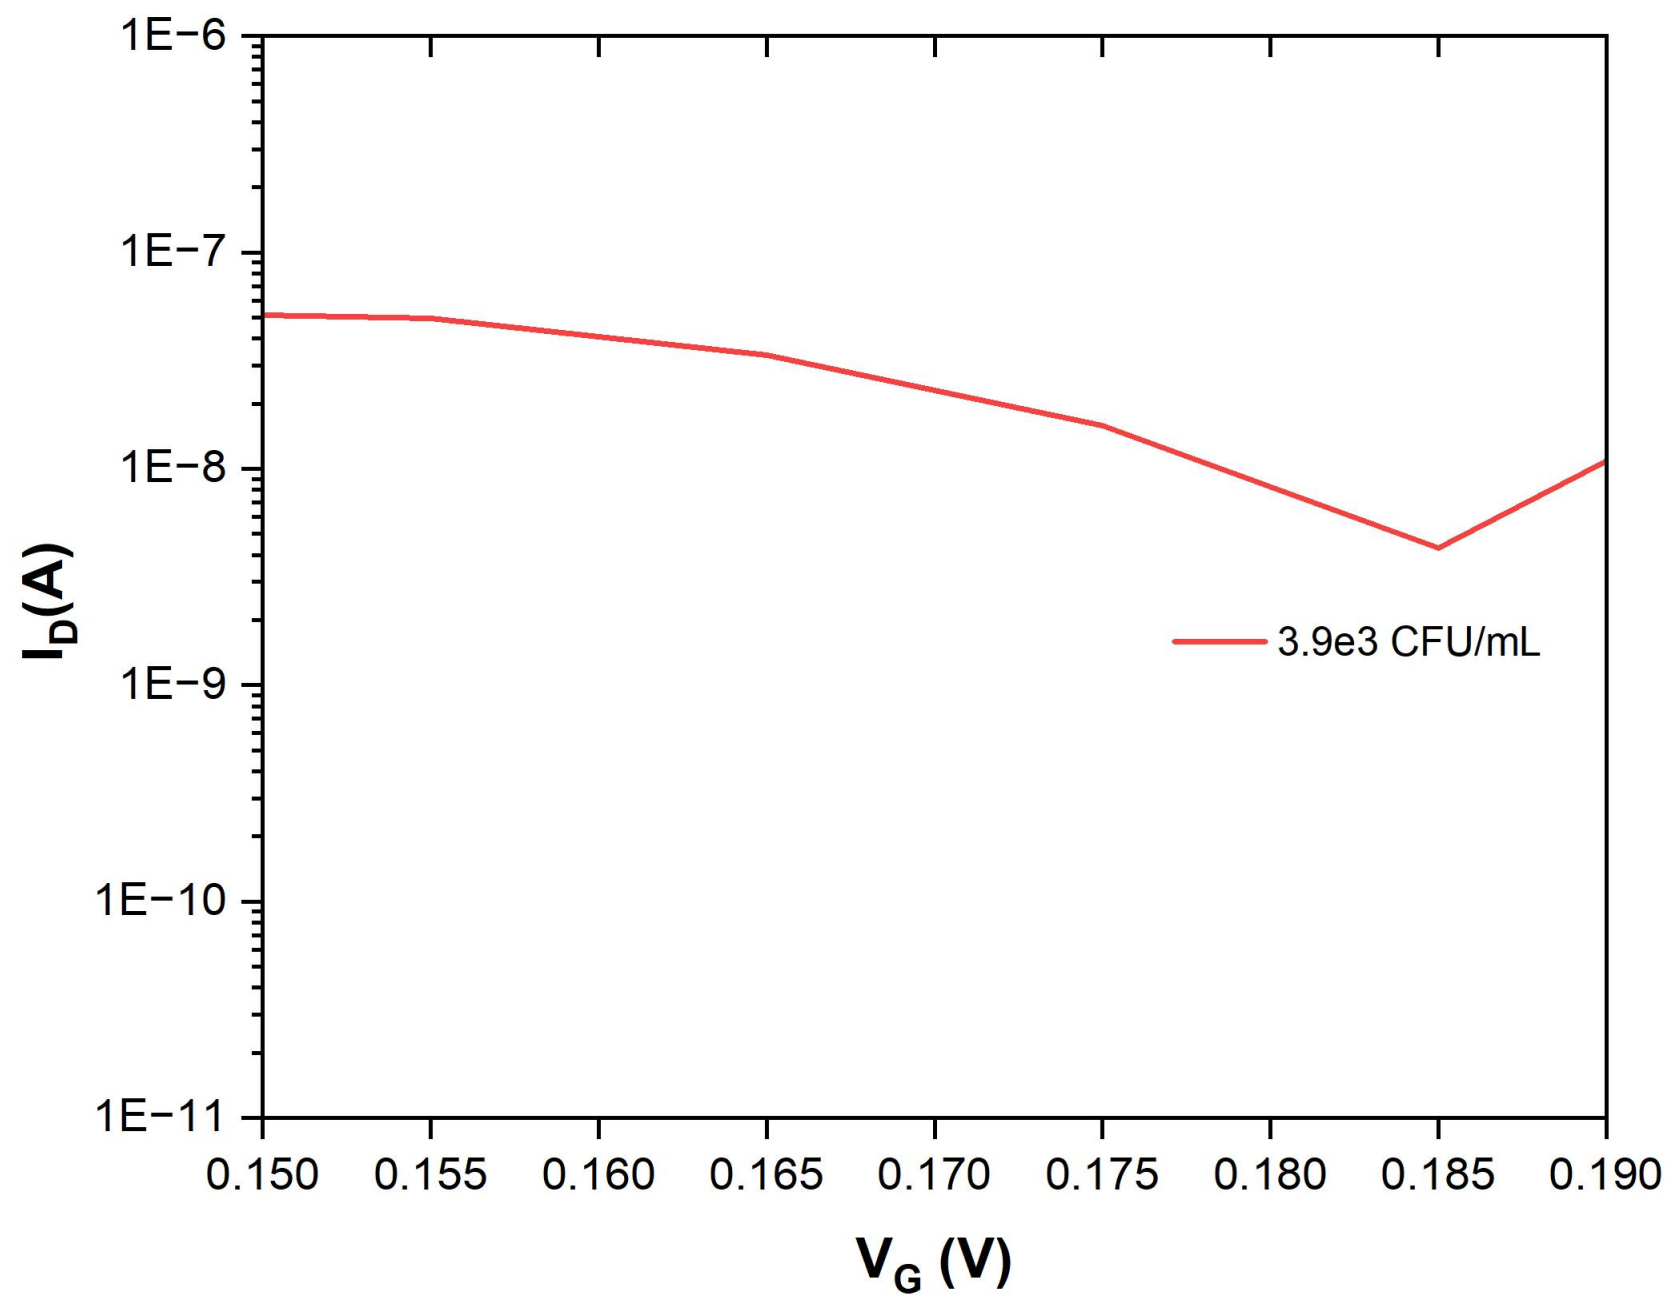

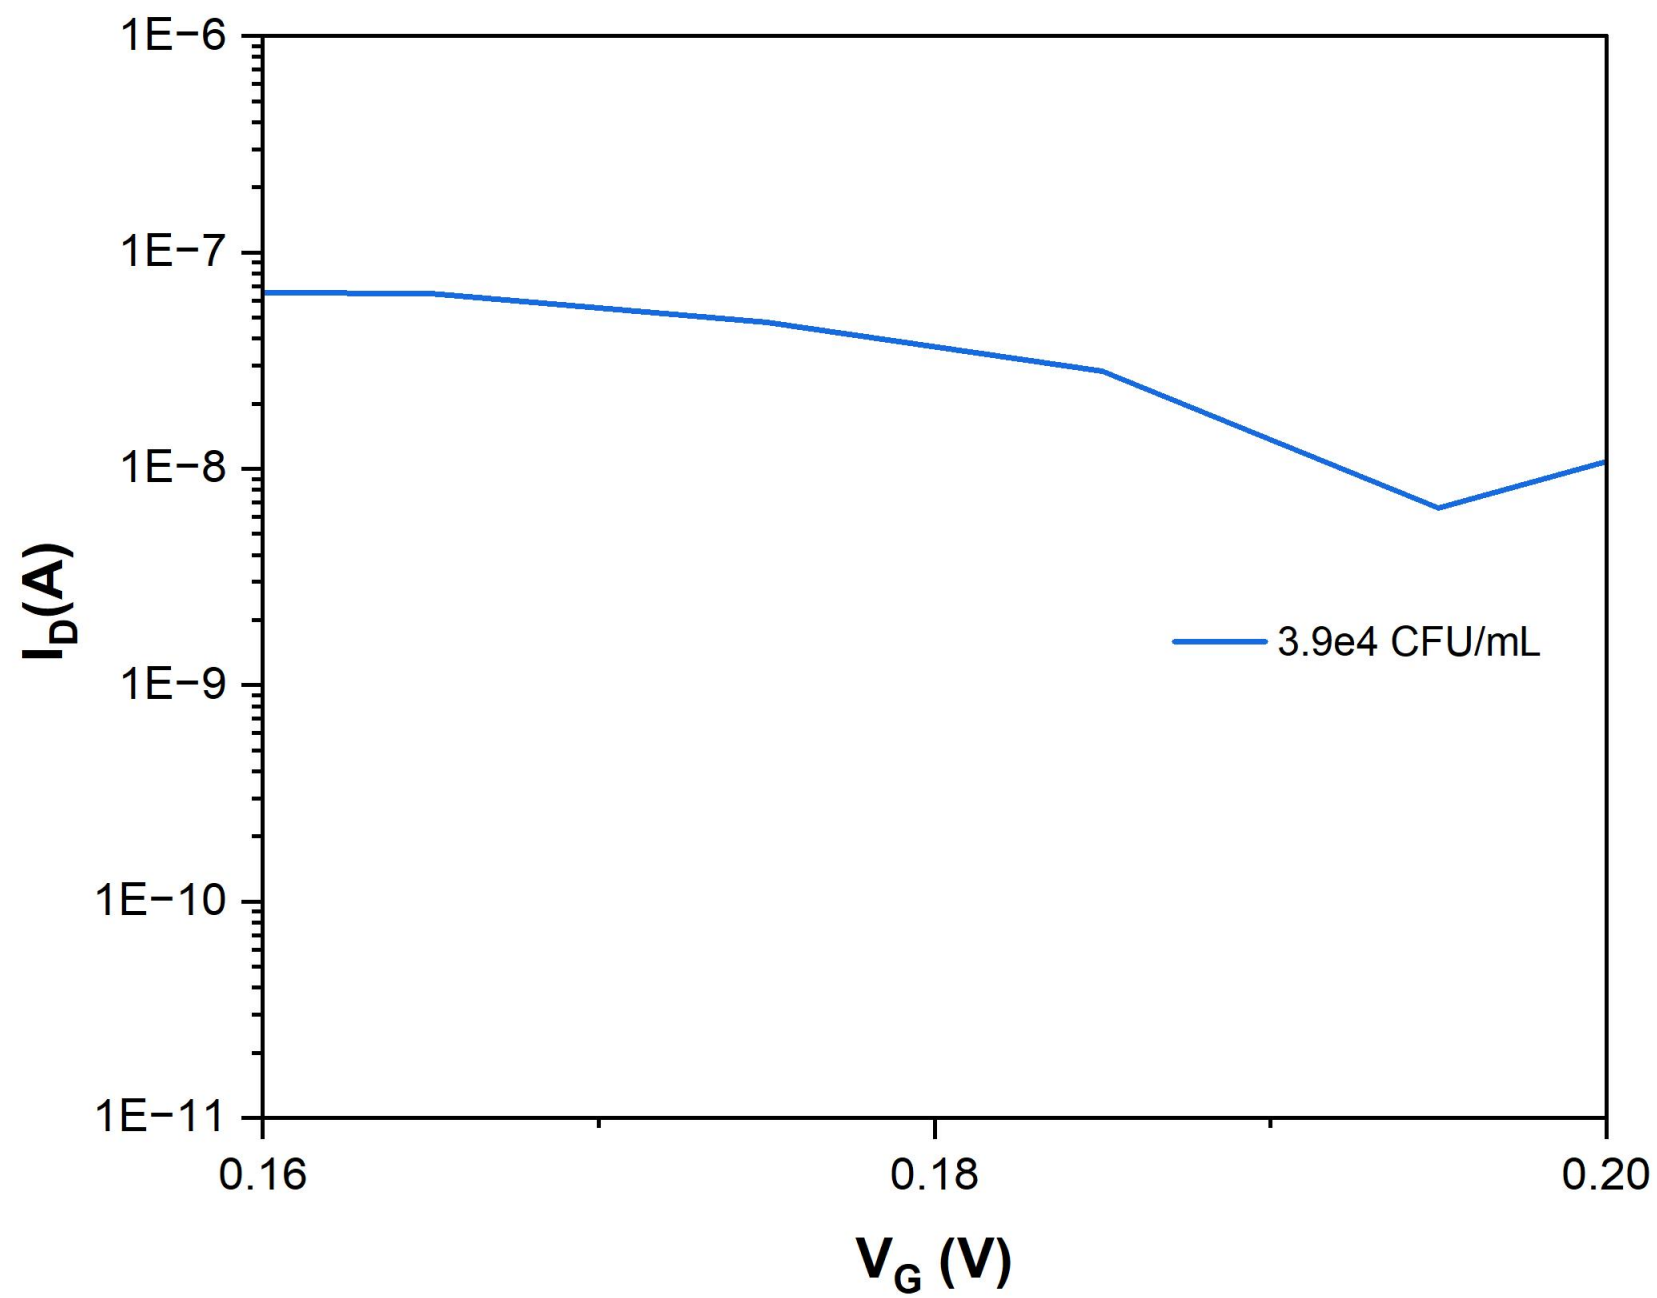

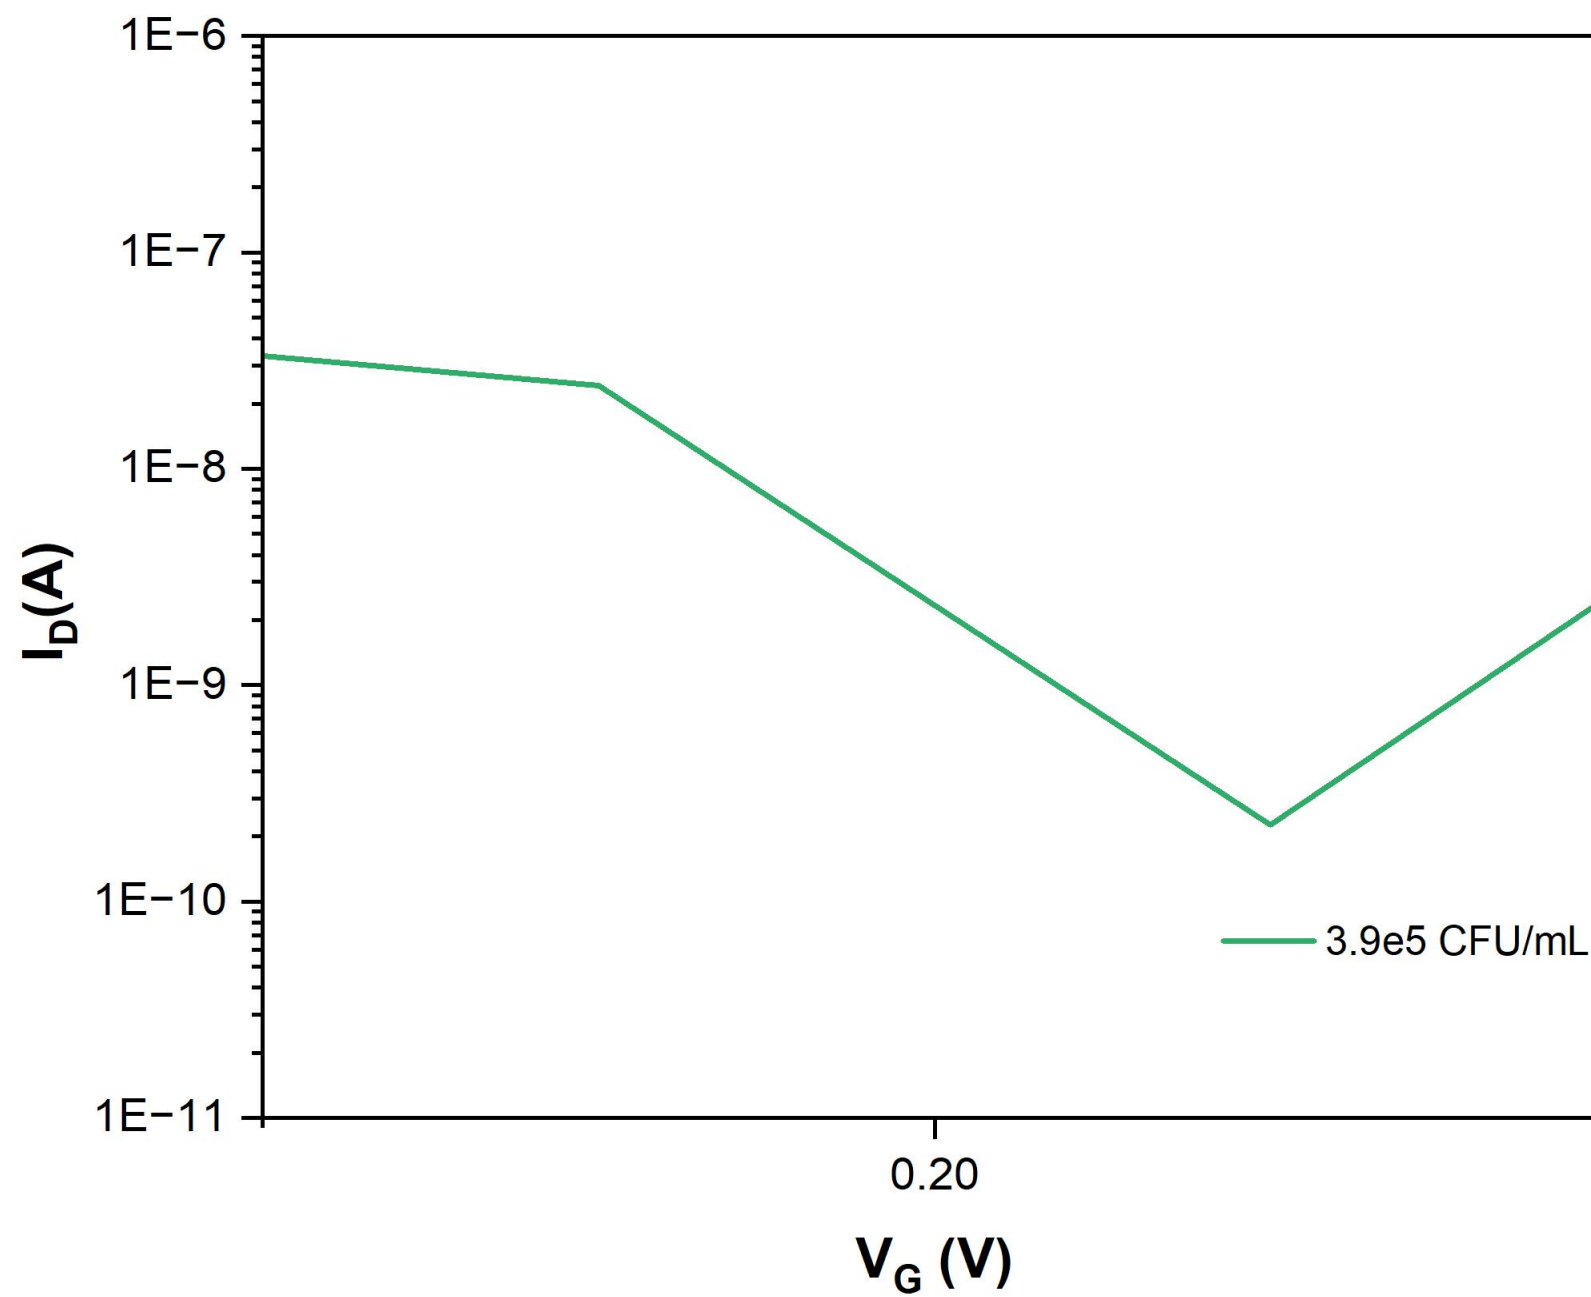

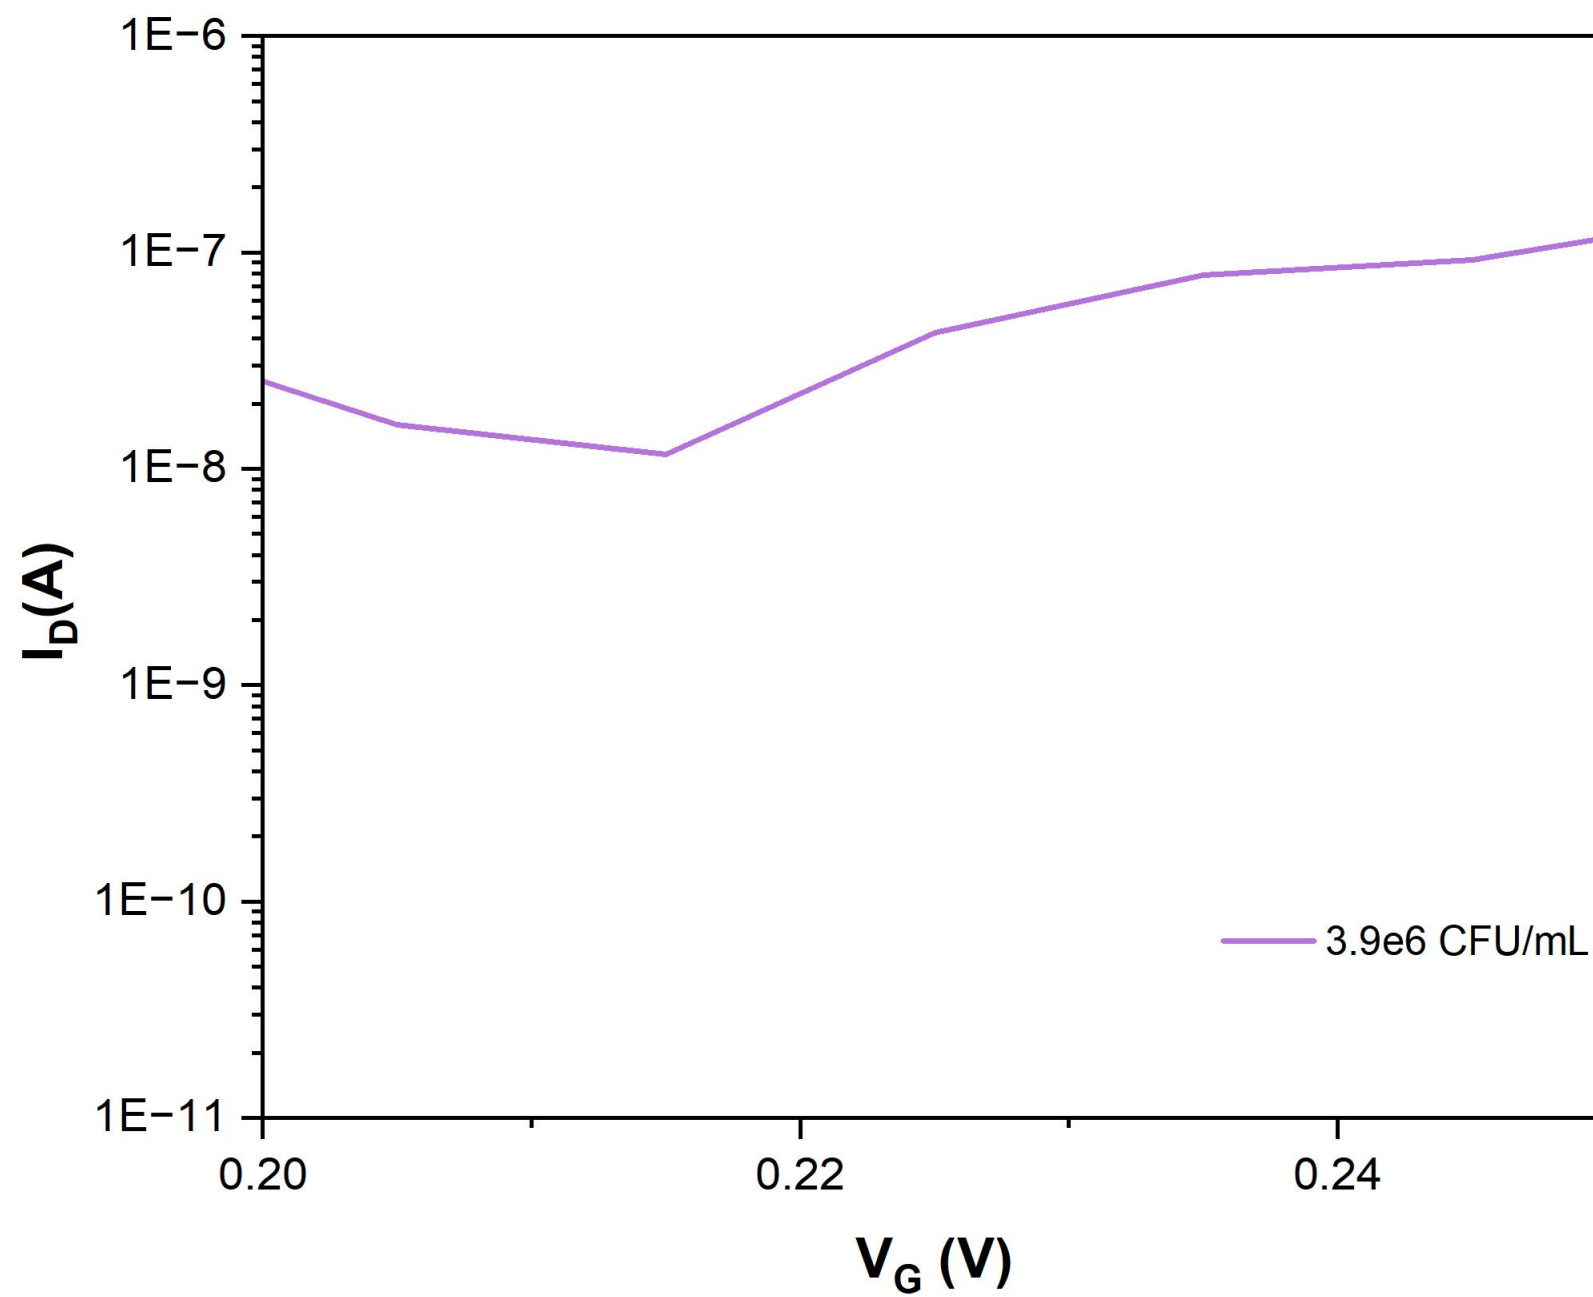

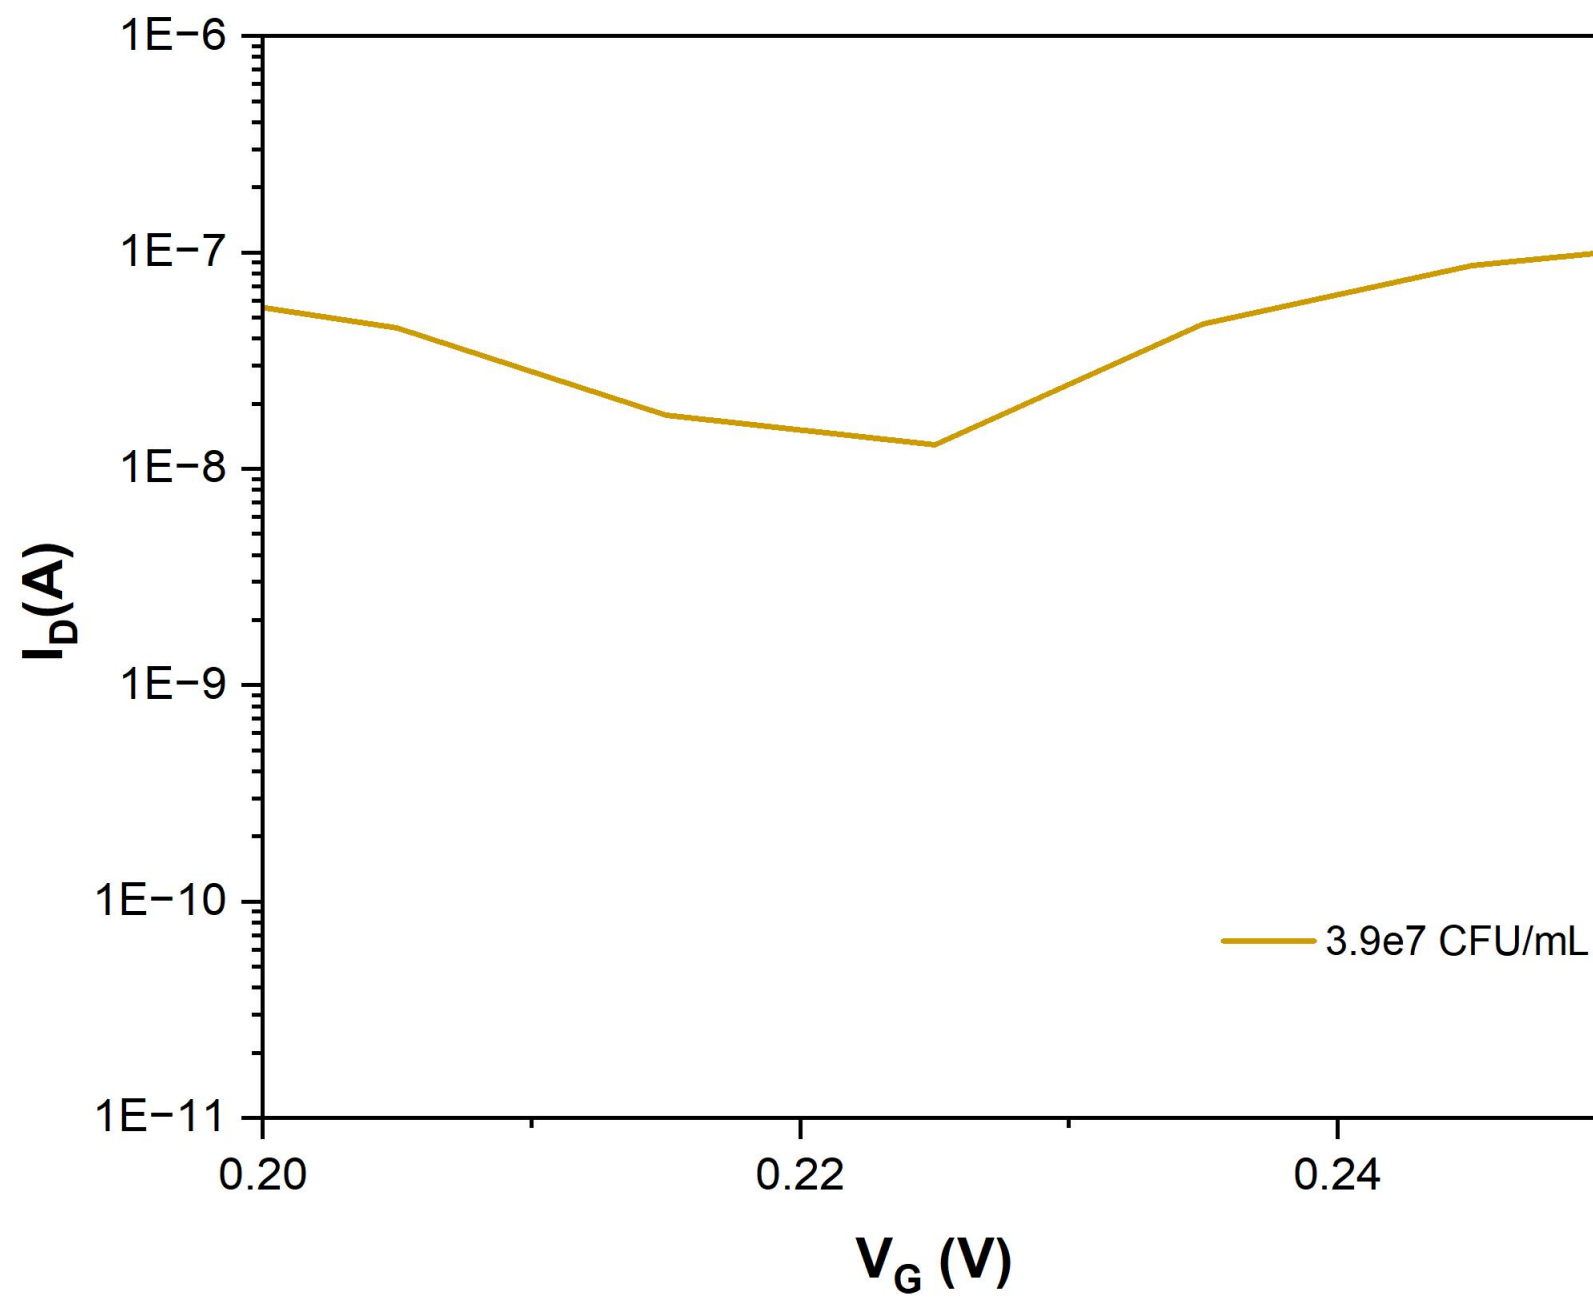

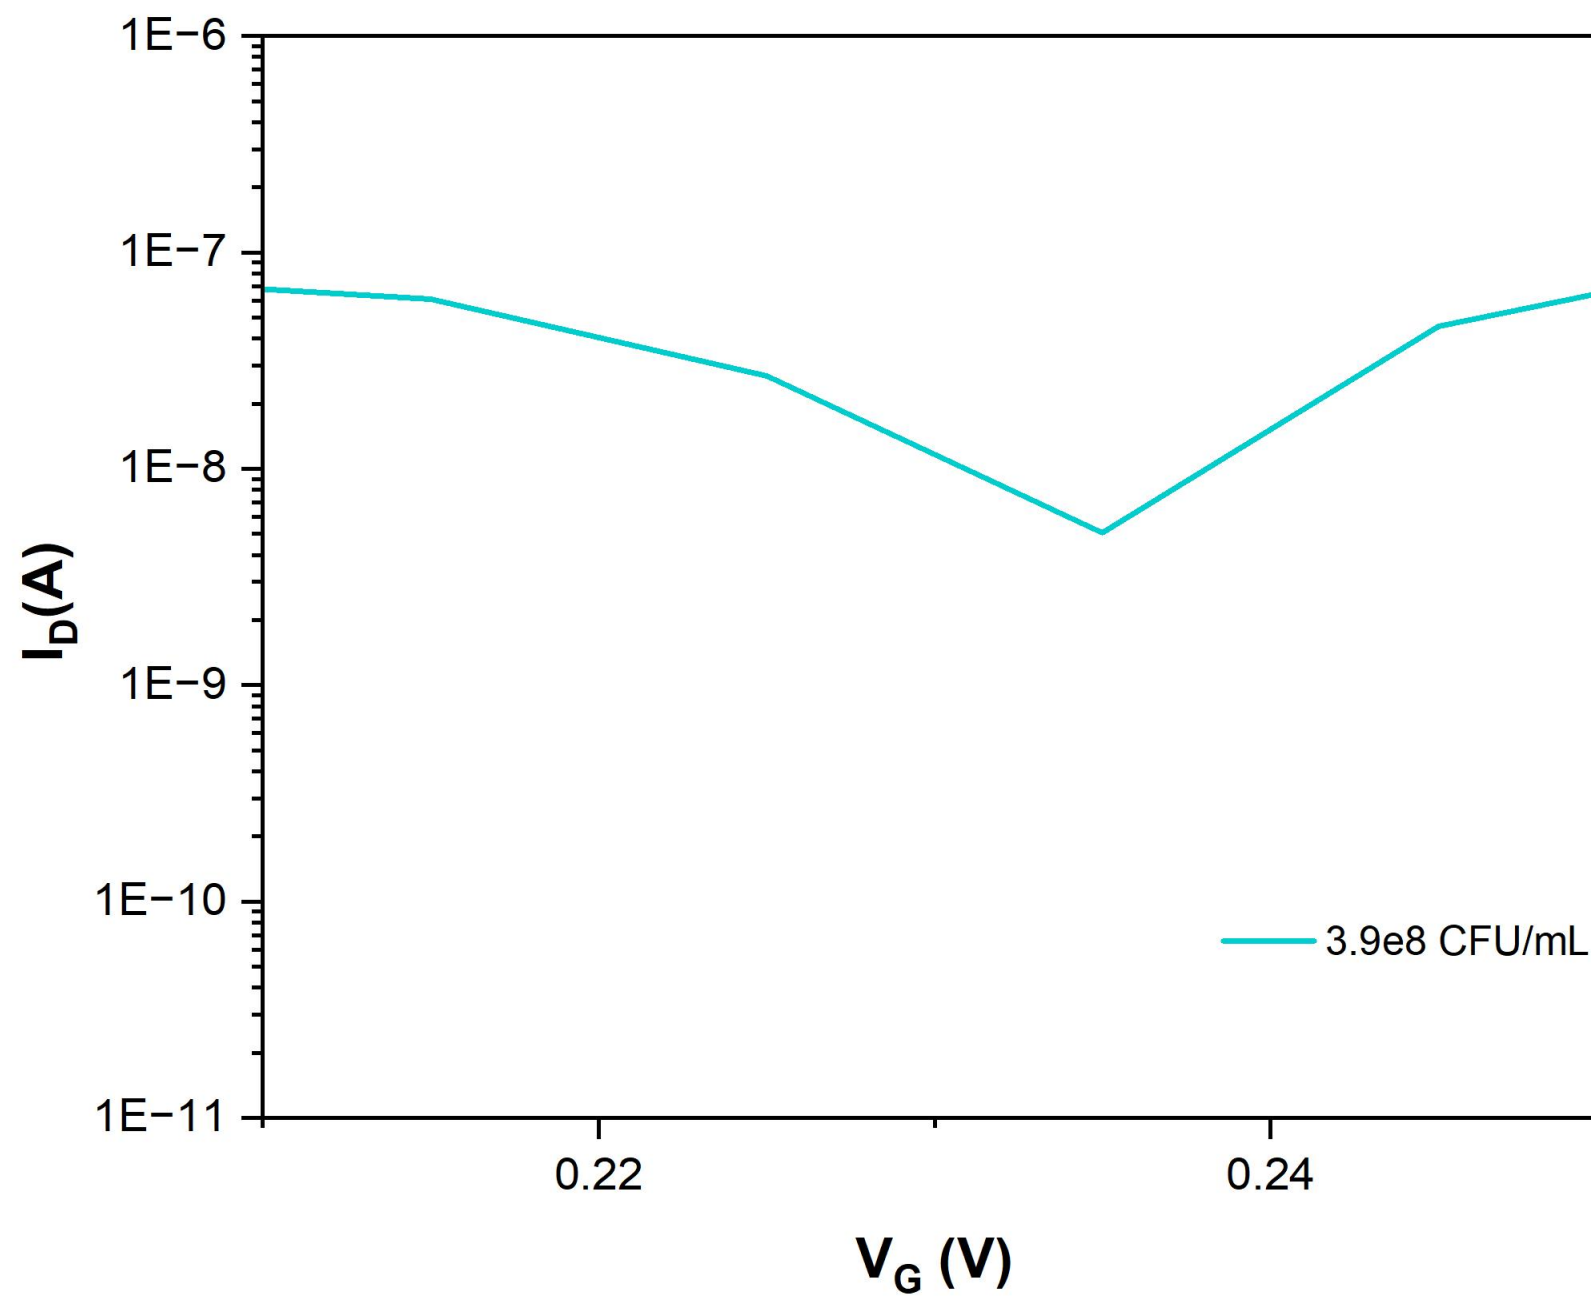

Supplement: Supplementary file 1 [file supplementary]
